# Supplementary material
Source: Springer Nature journal article supplement (https://www.springermedizin.de/resource/supplementary/12958_2012_987_MOESM3_ESM.pdf/9566568)

**A****Negative  
control****C-src  
siRNA****Blank  
control****c-src**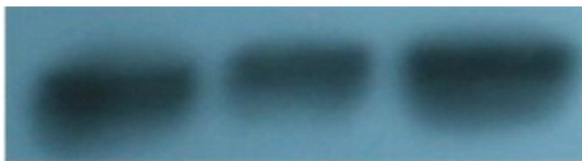 **$\beta$ -actin**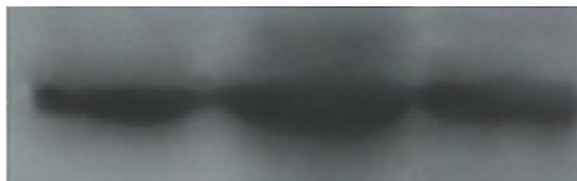**B**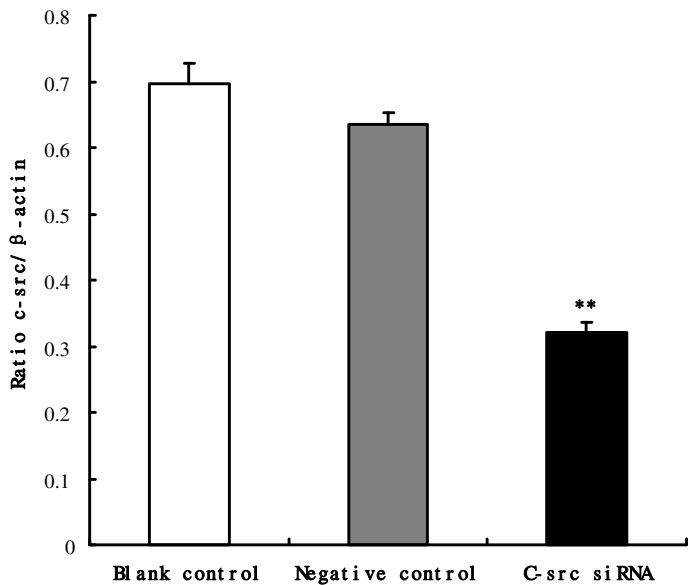

Supplement: MOESM3 [file 9566568]
